# Supplementary material for: Convolutional neural network to identify symptomatic Alzheimer’s disease using multimodal retinal imaging
Source: HighWire-hosted journal article supplement (doi:10.1136/bjophthalmol-2020-317659), 2020-11-26
Supplement: bjophthalmol-2020-317659supp005_data_supplement.pdf [file bjophthalmol-2020-317659supp005_data_supplement.pdf]

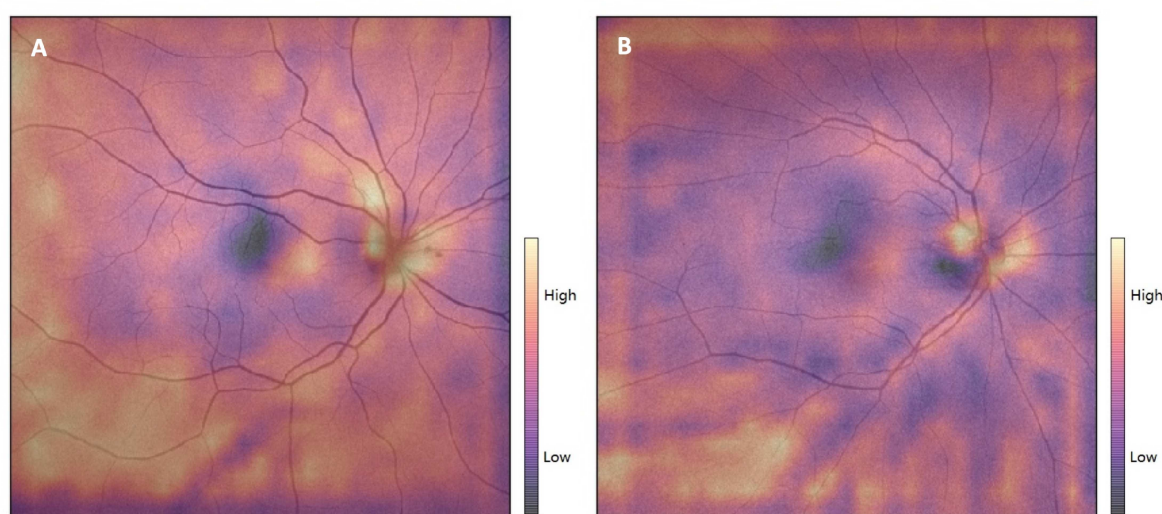

**Supplemental Figure 2:** A) and B) Attention maps based on class activation mappings (CAMs). The images of two different patients with symptomatic Alzheimer's disease demonstrate scattered foci of attention. These attention maps were generated for the 3-channel ultra-widefield images incorporating the color and fundus autofluorescence images. Colors shown as "High" on the color scale demonstrate that the model focuses more attention on those areas than areas "Low" on the color scale.
